# Supplementary material for: Mechanisms of Side Branching and Tip Splitting in a Model of Branching Morphogenesis
Source: PubMed Central journal article supplement (PMC4106868; doi:10.1371/journal.pone.0102718), 2014-07-22
Supplement: pone.0102718.s003.pdf [file pone.0102718.s003.pdf]

```

#include <cstdio>
#include <ctime>
#include <cmath>
#include <cstdlib>
#include <cassert>
#include <numeric>
#include "CImg.h"

////////////////////////////////////
#define XLEN          100
#define YLEN          100

#define DELTA_X       0.3
#ifndef D_A
#define D_A           0.02
#endif
#define D_A_2         0.02
#define D_H           0.26
#define D_Y           0
#define D_S           0.06
#define DELTA_TAU     DELTA_X*DELTA_X*0.4

#define A_INIT        0.001
#define H_INIT        0.01
#define Y_INIT        0.001
#define S_INIT        1

/*
#define A_INIT        0.25
#define H_INIT        0.0033
#define Y_INIT        0.02
#define S_INIT        1
*/

#define NUM_1          1
#define NUM_2          2
//////////////////////////////////// const //////////////////////////////////////
// not same //
#ifndef BIO_C
#define BIO_C          0.002
#endif
#define C_0            0.02
#define C_2            0.002
// not same //
#define MU             0.16
#define GAMMA          0.02
#define EPSILON        2.0
#define D              0.008
#define E              0.1
#define F              10

```

```

#ifndef RHO_A
#define RHO_A          0.03
#endif

#define RHO_H          0.0001
#define NU             0.04

#ifndef RA1
#define RA1            1
#endif

#ifndef RA2
#define RA2            1
#endif

#define RAND           0
#define RADIUS         2
#define TSTEP          2000

unsigned const jflone = 0x3F800000u;
unsigned const jflmsk = 0x007FFFFFFu;

using namespace std;
using namespace cimg_library;

// Grid array

float fga0[XLEN][YLEN];
float fga1[XLEN][YLEN];
int   iga0[XLEN][YLEN];

typedef float ( * mat_t ) [YLEN];
__global__ void Init ( mat_t dad, mat_t dhd, mat_t dsd, mat_t dyd ) {
    int i, j;
    i = blockIdx.x * blockDim.x + threadIdx.x;
    j = blockIdx.y * blockDim.y + threadIdx.y;
    if ( i >= 0 && i <= XLEN - 1 && j >= 0 && j <= YLEN - 1 ) {
        dad[i][j] = A_INIT;
        dhd[i][j] = H_INIT;
        dsd[i][j] = 0.0;
        dyd[i][j] = 0.0;
    }
    __syncthreads ( );
    if ( i >= XLEN / 2 - RADIUS && i <= XLEN / 2 + RADIUS && j >=
0 && j <= 10 ) {
        dyd[i][j] = 1.0;
        dsd[i][j] = 0.5;
    }
}

```

```

__global__ void update ( mat_t dad, mat_t dau, mat_t dhd, mat_t dhu,
mat_t dsd, mat_t dsu, mat_t dyd, mat_t dyu, int num) {
    int i, j;
    i = blockIdx.x * blockDim.x + threadIdx.x;
    j = blockIdx.y * blockDim.y + threadIdx.y;
    if ( i <= 0 || i >= XLEN - 1 || j <= 0 || j >= YLEN - 1 )
return;
        // dad -> dau
    // dad -> dau
    dau[i][j] = dad[i][j] + DELTA_TAU * (
        BIO_C * dad[i][j] * dad[i][j] * dsd[i][j] /
dhd[i][j] -
        MU * dad[i][j] +
        D_A * (
            ( dad[i-1][j] - 2 * dad[i][j] +
dad[i+1][j] ) / DELTA_X / DELTA_X +
            ( dad[i][j-1] - 2 * dad[i][j] +
dad[i][j+1] ) / DELTA_X / DELTA_X
        ) +
        RHO_A * dyd[i][j]
    );
    // dhd -> dhu
    dhu[i][j] = dhd[i][j] + DELTA_TAU * (
        BIO_C * dad[i][j] * dad[i][j] * dsd[i][j] -
        NU * dhd[i][j] +
        D_H * (
            ( dhd[i-1][j] - 2 * dhd[i][j] +
dhd[i+1][j] ) / DELTA_X / DELTA_X +
            ( dhd[i][j-1] - 2 * dhd[i][j] +
dhd[i][j+1] ) / DELTA_X / DELTA_X
        ) +
        RHO_H * dyd[i][j]
    );
    // dsd -> dsu
    // dyd -> dyu
    // growing process
    if ( i >= XLEN / 2 - RADIUS && i <= XLEN / 2 + RADIUS && j ==
num ) {
        dyd[i][num] = 1.0;
        dsd[i][num] = 0.5;
    } else {
        dsu[i][j] = dsd[i][j];
        dyu[i][j] = dyd[i][j];
    }
    __syncthreads ( );
    if ( i == 1 && j == 1 ) {
        dau[0][0] = dau[1][0] = dau[0][1] = dau[1][1];
        dhu[0][0] = dhu[1][0] = dhu[0][1] = dhu[1][1];
        dsu[0][0] = dsu[1][0] = dsu[0][1] = dsu[1][1];
    }
}

```

```

        dyu[0][0] = dyu[1][0] = dyu[0][1] = dyu[1][1];
    } else if ( i == 1 && j == YLEN - 2 ) {
        dau[0][YLEN-1] = dau[1][YLEN-1] = dau[0][YLEN-2] =
dau[1][YLEN-2];
        dhu[0][YLEN-1] = dhu[1][YLEN-1] = dhu[0][YLEN-2] =
dhu[1][YLEN-2];
        dsu[0][YLEN-1] = dsu[1][YLEN-1] = dsu[0][YLEN-2] =
dsu[1][YLEN-2];
        dyu[0][YLEN-1] = dyu[1][YLEN-1] = dyu[0][YLEN-2] =
dyu[1][YLEN-2];
    } else if ( i == XLEN - 2 && j == 1 ) {
        dau[XLEN-1][0] = dau[XLEN-2][0] = dau[XLEN-1][1] =
dau[XLEN-2][1];
        dhu[XLEN-1][0] = dhu[XLEN-2][0] = dhu[XLEN-1][1] =
dhu[XLEN-2][1];
        dsu[XLEN-1][0] = dsu[XLEN-2][0] = dsu[XLEN-1][1] =
dsu[XLEN-2][1];
        dyu[XLEN-1][0] = dyu[XLEN-2][0] = dyu[XLEN-1][1] =
dyu[XLEN-2][1];
    } else if ( i == XLEN - 2 && j == YLEN - 2 ) {
        dau[XLEN-1][YLEN-1] = dau[XLEN-2][YLEN-1] =
dau[XLEN-1][YLEN-2] = dau[XLEN-2][YLEN-2];
        dhu[XLEN-1][YLEN-1] = dhu[XLEN-2][YLEN-1] =
dhu[XLEN-1][YLEN-2] = dhu[XLEN-2][YLEN-2];
        dsu[XLEN-1][YLEN-1] = dsu[XLEN-2][YLEN-1] =
dsu[XLEN-1][YLEN-2] = dsu[XLEN-2][YLEN-2];
        dyu[XLEN-1][YLEN-1] = dyu[XLEN-2][YLEN-1] =
dyu[XLEN-1][YLEN-2] = dyu[XLEN-2][YLEN-2];
    } else if ( i == 1 || j == 1 || i == XLEN - 2 || j == YLEN -
2 ) {
        if ( i == 1 ) {
            dau[0][j] = dau[1][j];
            dhu[0][j] = dhu[1][j];
            dsu[0][j] = dsu[1][j];
            dyu[0][j] = dyu[1][j];
        } else if ( j == 1 ) {
            dau[i][0] = dau[i][1];
            dhu[i][0] = dhu[i][1];
            dsu[i][0] = dsu[i][1];
            dyu[i][0] = dyu[i][1];
        } else if ( i == XLEN - 2 ) {
            dau[XLEN-1][j] = dau[XLEN-2][j];
            dhu[XLEN-1][j] = dhu[XLEN-2][j];
            dsu[XLEN-1][j] = dsu[XLEN-2][j];
            dyu[XLEN-1][j] = dyu[XLEN-2][j];
        } else if ( j == YLEN - 2 ) {
            dau[i][YLEN-1] = dau[i][YLEN-2];
            dhu[i][YLEN-1] = dhu[i][YLEN-2];
            dsu[i][YLEN-1] = dsu[i][YLEN-2];
            dyu[i][YLEN-1] = dyu[i][YLEN-2];
        }
    }

```

```

        }
    }
}

void cout_result ( int n, float ( *dp )[YLEN], const char * type ) {
    float min, max;
    float * d = &dp[0][0];
    float * de = d + XLEN * YLEN;
    char file[256];
    int i, j;
    min = max = dp[0][0];
    for ( ++d; d != de; ++d ) {
        if ( min > *d ) min = *d;
        if ( max < *d ) max = *d;
    }
    sprintf ( file, "%s_%.3d.bmp", type, n );
    printf ("%s %.8lf %.8lf \n\n", file, min, max );
    float tran_factor = ( max - min ) / 255;
    CImg < unsigned char > img ( XLEN, YLEN );
    for( i = 0; i < XLEN; ++i ) {
        for ( j = 0; j < YLEN; ++j ) {
            int b = ( max - dp[i][j] ) / tran_factor;
            img ( i , j ) = b;
        }
    }
    img.save_bmp ( file );
    // write to file
    sprintf ( file, "%s_%.3d.txt", type, n );
    FILE * f = fopen ( file, "w" );
    fwrite ( dp, sizeof ( float ), XLEN * YLEN, f );
    fclose ( f );
}

void min_max ( float *d, float &min, float &max, float & tran_factor )
{
    float *de = d + XLEN * YLEN;
    min = max = *d;
    for ( ++d; d != de; ++d ) {
        if ( min > *d ) min = *d;
        if ( max < *d ) max = *d;
    }
    tran_factor = ( max - min ) / 255;
}

void bi_cout_result ( int n, float ( *dp )[YLEN], float ( *dq )[YLEN],
const char * type ) {
    int i, j, b;
    char file[256];
    float min_dp, min_dq, max;
    float tran_factor_1, tran_factor_2;
    min_max ( dp[0], min_dp, max, tran_factor_1 );

```

```

min_max ( dq[0], min_dq, max, tran_factor_2 );
sprintf ( file, "%s_%.3d.bmp", type, n );
CImg < unsigned char > img ( XLEN, YLEN, 1, 3 );
for( i = 0; i < XLEN; ++i ) {
    for ( j = 0; j < YLEN; ++j ) {
        b = ( dp[i][j] - min_dp ) / tran_factor_1;
        img ( i, j, 0, 0 ) = b;
        if ( b < 50 ) {
            b = ( dq[i][j] - min_dq ) /
tran_factor_2;
            img ( i, j, 0, 1 ) = b;
        } else
            img ( i, j, 0, 1 ) = 0;
        img ( i, j, 0, 2 ) = 0;
    }
}
img.save_bmp ( file );
}
int main ( int argc, char **argv ) {
    long long TAU = 200000;

    clock_t tb, te;
    tb = clock ( );

    float ( * a ) [YLEN] = fga0 ;
    int ( * rad ) [YLEN] = iga0 ;
    int BLOCK_SIZE = 16;

    int memsize = XLEN * YLEN * sizeof ( float ) ;
    // init d_a_down d_h_down d_s_down d_y_down
    float ( * dad ) [YLEN];
    cudaMalloc ( ( void ** ) &dad, memsize );
    float ( * dau ) [YLEN];
    cudaMalloc ( ( void ** ) &dau, memsize );
    float ( * dhd ) [YLEN];
    cudaMalloc ( ( void ** ) &dhd, memsize );
    float ( * dhu ) [YLEN];
    cudaMalloc ( ( void ** ) &dhu, memsize );
    float ( * dsd ) [YLEN];
    cudaMalloc ( ( void ** ) &dsd, memsize );
    float ( * dsu ) [YLEN];
    cudaMalloc ( ( void ** ) &dsu, memsize );
    float ( * dyd ) [YLEN];
    cudaMalloc ( ( void ** ) &dyd, memsize );
    float ( * dyu ) [YLEN];
    cudaMalloc ( ( void ** ) &dyu, memsize );
    float ( * gtmp ) [YLEN];

    dim3 dimBlock ( BLOCK_SIZE, BLOCK_SIZE );
    dim3 dimGrid ( ( XLEN + BLOCK_SIZE - 1 ) / BLOCK_SIZE, ( YLEN

```

```

+ BLOCK_SIZE - 1 ) / BLOCK_SIZE );
    // Init
    Init <<< dimGrid, dimBlock >>> ( dad, dhd, dsd, dyd );
    // update
    for ( int k = 0; k <= TAU; ++k ) {
        update <<< dimGrid, dimBlock >>> ( dad, dau, dhd,
dhu, dsd, dsu, dyd, dyu, k / TSTEP );
        gtmp = dad; dad = dau; dau = gtmp;
        gtmp = dhd; dhd = dhu; dhu = gtmp;
        gtmp = dsd; dsd = dsu; dsu = gtmp;
        gtmp = dyd; dyd = dyu; dyu = gtmp;
        if ( k % TSTEP ) continue;
        cudaMemcpy ( a, dau, XLEN * YLEN * sizeof ( float ),
cudaMemcpyDeviceToHost );
        cout_result ( k / TSTEP, a, "a" );
        cudaMemcpy ( a, dhu, XLEN * YLEN * sizeof ( float ),
cudaMemcpyDeviceToHost );
        cout_result ( k / TSTEP, a, "h" );
        cudaMemcpy ( a, dyu, XLEN * YLEN * sizeof ( float ),
cudaMemcpyDeviceToHost );
        cout_result ( k / TSTEP, a, "y" );
        cudaMemcpy ( a, dsu, XLEN * YLEN * sizeof ( float ),
cudaMemcpyDeviceToHost );
        cout_result ( k / TSTEP, a, "s" );
    }
    cudaFree ( dad );
    cudaFree ( dau );
    cudaFree ( dhd );
    cudaFree ( dhu );
    cudaFree ( dsd );
    cudaFree ( dsu );
    cudaFree ( dyd );
    cudaFree ( dyu );
    te = clock ( );
    printf ("%lf\n", double ( te -tb ) / CLOCKS_PER_SEC );
    return 0;
}

```
